# Supplementary material for: The Relationship Between Engagement and Neurophysiological Measures of Attention in Motion-Controlled Video Games: A Randomized Controlled Trial
Source: PubMed Central journal article supplement (PMC4858597; doi:10.2196/games.5460), 2016-04-21
Supplement: games_v4i1e4_app1.pdf [file games_v4i1e4_app1.pdf]

## Multimedia Appendix 1

Details of regression models exploring the relationship between the eP3a, post-test performance, and self-reported engagement.

---

Model 1: Post-Test Score = Training Condition + eP3a

|              | SS       | Df    | MS              | <i>F</i>        | R <sup>2</sup> Change |
|--------------|----------|-------|-----------------|-----------------|-----------------------|
| Regression   | 2361.43  | 2     | 1180.72         | 0.92            | 0.045                 |
| Residual     | 46104.61 | 36    | 1280.68         |                 |                       |
| Coefficients | $\beta$  | SE    | <i>t</i> -value | <i>p</i> -value |                       |
| Intercept    | 372.63   | 12.84 | 29.03           | <0.001          |                       |
| Condition    | -0.32    | 5.93  | -0.05           | 0.96            |                       |
| eP3a         | 1.64     | 1.26  | 1.30            | 0.20            |                       |

---

Model 2: Engagement Score = Training Condition + eP3a

|              | SS      | Df   | MS              | <i>F</i>        | R <sup>2</sup> Change |
|--------------|---------|------|-----------------|-----------------|-----------------------|
| Regression   | 5.09    | 2    | 2.54            | 3.20            | 0.14                  |
| Residual     | 28.75   | 36   | 0.79            |                 |                       |
| Coefficients | $\beta$ | SE   | <i>t</i> -value | <i>p</i> -value |                       |
| Intercept    | 4.67    | 0.32 | 14.57           | <0.001          |                       |
| Condition    | 0.01    | 0.15 | 0.09            | 0.93            |                       |
| eP3a         | -0.08   | 0.03 | -2.42           | 0.02            |                       |

Note. Regression coefficients are not standardized and are thus interpretable in their natural units. For the Training Condition variable, Sterile = '-1' and Game = '1'. R<sup>2</sup> Change refers to the additional variance explained in the current model beyond a model with Training Condition only. The addition of the Training Condition X eP3a interaction did not improve either model.
